# Supplementary material for: Malaysian Parents’ Willingness to Vaccinate Their Children against COVID-19 Infection and Their Perception of mRNA COVID-19 Vaccines
Source: MDPI journal article supplement (doi:10.3390/vaccines10111790), 2022-10-25
Supplement: s1 [file s1]

# PARENTS' PERCEPTION ABOUT THE COVID-19 VACCINES AND WILLINGNESS TO VACCINATE THEIR CHILDREN AGAINST COVID-19 INFECTION

## Section A GENERAL INFORMATION

|   |                                        |                                                                                                                                                                                                                                                                                                                                                                                                                                                                                                                                                                                                                                                                                                  |
|---|----------------------------------------|--------------------------------------------------------------------------------------------------------------------------------------------------------------------------------------------------------------------------------------------------------------------------------------------------------------------------------------------------------------------------------------------------------------------------------------------------------------------------------------------------------------------------------------------------------------------------------------------------------------------------------------------------------------------------------------------------|
| 1 | Age                                    | _____ years old                                                                                                                                                                                                                                                                                                                                                                                                                                                                                                                                                                                                                                                                                  |
| 2 | Gender                                 | <input type="checkbox"/> [ 1 ] Male<br><input type="checkbox"/> [ 2 ] Female                                                                                                                                                                                                                                                                                                                                                                                                                                                                                                                                                                                                                     |
| 3 | Ethnicity                              | <input type="checkbox"/> [ 1 ] Malay<br><input type="checkbox"/> [ 2 ] Chinese<br><input type="checkbox"/> [ 3 ] Indian<br><input type="checkbox"/> [ 4 ] Bumiputera Sabah/Sarawak<br><input type="checkbox"/> [ 5 ] Others, please specify: _____                                                                                                                                                                                                                                                                                                                                                                                                                                               |
| 4 | Monthly average household income (MYR) | <div style="border-bottom: 1px solid black; height: 1.2em; margin-bottom: 5px;"></div> <input type="checkbox"/> [ 1 ] MYR 1,000 and below<br><input type="checkbox"/> [ 2 ] MYR 1,001 to 2,000<br><input type="checkbox"/> [ 3 ] MYR 2,001 to 3,000<br><input type="checkbox"/> [ 4 ] MYR 3,001 to 4,000<br><input type="checkbox"/> [ 5 ] MYR 4,001 to 5,000<br><input type="checkbox"/> [ 6 ] MYR 5,001 to 6,000<br><input type="checkbox"/> [ 7 ] MYR 6,001 to 7,000<br><input type="checkbox"/> [ 8 ] MYR 7,001 to 8,000<br><input type="checkbox"/> [ 9 ] MYR 8,001 to 9,000<br><input type="checkbox"/> [ 10 ] MYR 9,001 to 10,000<br><input type="checkbox"/> [ 11 ] More than MYR 10,000 |

## Section B Willingness to vaccinate your child with COVID-19 vaccine

|   |                                                                              |                                                                                                                                                                                                                                                      |
|---|------------------------------------------------------------------------------|------------------------------------------------------------------------------------------------------------------------------------------------------------------------------------------------------------------------------------------------------|
| 1 | What is your willingness to vaccinate your child against COVID-19 infection? | <input type="checkbox"/> [ 1 ] Extremely Willing<br><input type="checkbox"/> [ 2 ] Somewhat willing<br><input type="checkbox"/> [ 3 ] Undecided<br><input type="checkbox"/> [ 4 ] Somewhat not willing<br><input type="checkbox"/> [ 5 ] Not willing |
|---|------------------------------------------------------------------------------|------------------------------------------------------------------------------------------------------------------------------------------------------------------------------------------------------------------------------------------------------|

### Section C

#### Perception of the risk of acquiring COVID-19

|   |                                                                                                                              |                                                                                                                                                                              |
|---|------------------------------------------------------------------------------------------------------------------------------|------------------------------------------------------------------------------------------------------------------------------------------------------------------------------|
| 1 | The COVID-19 vaccine for children is not needed as children are not as susceptible to COVID-19 infection compared to adults. | <input type="checkbox"/> 1 ] Strongly disagree<br><input type="checkbox"/> 2 ] Disagree<br><input type="checkbox"/> 3 ] Agree<br><input type="checkbox"/> 4 ] Strongly agree |
|---|------------------------------------------------------------------------------------------------------------------------------|------------------------------------------------------------------------------------------------------------------------------------------------------------------------------|

### Section D

#### Concerns about COVID-19 vaccination for children

The following is the list of concerns over COVID-19 vaccines for children. Please rate your level of concern/worry.

|   |                                                                        |                                                                                                                                                                                                               |
|---|------------------------------------------------------------------------|---------------------------------------------------------------------------------------------------------------------------------------------------------------------------------------------------------------|
| 1 | Severe adverse effects after COVID-19 vaccination                      | <input type="checkbox"/> 1 ] Not at all concerned<br><input type="checkbox"/> 2 ] Slightly concerned<br><input type="checkbox"/> 3 ] Moderately concerned<br><input type="checkbox"/> 4 ] Extremely concerned |
| 2 | Unknown long-term side effects that may show up months or years later. | <input type="checkbox"/> 1 ] Not at all concerned<br><input type="checkbox"/> 2 ] Slightly concerned<br><input type="checkbox"/> 3 ] Moderately concerned<br><input type="checkbox"/> 4 ] Extremely concerned |
| 3 | Children may get COVID-19 from the vaccines                            | <input type="checkbox"/> 1 ] Not at all concerned<br><input type="checkbox"/> 2 ] Slightly concerned<br><input type="checkbox"/> 3 ] Moderately concerned<br><input type="checkbox"/> 4 ] Extremely concerned |
| 4 | Risk of death following COVID-19 vaccination                           | <input type="checkbox"/> 1 ] Not at all concerned<br><input type="checkbox"/> 2 ] Slightly concerned<br><input type="checkbox"/> 3 ] Moderately concerned<br><input type="checkbox"/> 4 ] Extremely concerned |

Section E

**mRNA vaccines Acceptance**

|   |                                                                                       |                                                                                                                                                              |
|---|---------------------------------------------------------------------------------------|--------------------------------------------------------------------------------------------------------------------------------------------------------------|
| 1 | Preference of type of COVID-19 vaccine for your child                                 | [ 1 ] mRNA covid-19 vaccine<br>[ 2 ] Conventional COVID-19 vaccine<br>[ 3 ] No preference                                                                    |
| 2 | How concerned (or worried) are you about your child getting an mRNA COVID-19 vaccine? | [ 1 ] Not at all concerned<br>[ 2 ] Slightly concerned<br>[ 3 ] Moderately concerned<br>[ 4 ] Extremely concerned<br>[ 5 ] I don't know what is mRNA vaccine |

Section F

**Knowledge of mRNA vaccines**

|   |                                                                                                                                                         |            |             |                           |
|---|---------------------------------------------------------------------------------------------------------------------------------------------------------|------------|-------------|---------------------------|
| 1 | AstraZeneca, Sinovac and Johnson & Johnson COVID-19 vaccinees are considered viral vector-based (conventional/traditional vaccines)                     | [ 1 ] True | [ 2 ] False | [ 3 ] Don't know/Not sure |
| 2 | Pfizer and Moderna COVID-19 vaccines are messenger RNA vaccines                                                                                         | [ 1 ] True | [ 2 ] False | [ 3 ] Don't know/Not sure |
| 3 | Conventional/traditional vaccines perform this task by introducing a dead, inactive, or modified portion of a virus into our body to generate immunity. | [ 1 ] True | [ 2 ] False | [ 3 ] Don't know/Not sure |
| 4 | The mRNA vaccines work by introducing a piece of mRNA that corresponds to a viral protein to generate immunity.                                         | [ 1 ] True | [ 2 ] False | [ 3 ] Don't know/Not sure |

Section G

**Perception on mRNA vaccines**

|   |                                                                                                                       |                                                                                                                                                                                                                          |
|---|-----------------------------------------------------------------------------------------------------------------------|--------------------------------------------------------------------------------------------------------------------------------------------------------------------------------------------------------------------------|
| 1 | I have confidence in the new and advanced technological approach used in the development of the COVID-19 mRNA vaccine | <input type="checkbox"/> 1 Strongly disagree<br><input type="checkbox"/> 2 Disagree<br><input type="checkbox"/> 3 Agree<br><input type="checkbox"/> 4 Strongly agree<br><input type="checkbox"/> 5 Don't know/no opinion |
| 2 | I am worried there might be unknown side effects of the mRNA vaccines that will show up months or years later.        | <input type="checkbox"/> 1 Strongly disagree<br><input type="checkbox"/> 2 Disagree<br><input type="checkbox"/> 3 Agree<br><input type="checkbox"/> 4 Strongly agree<br><input type="checkbox"/> 5 Don't know/no opinion |
| 3 | The conventional/traditional COVID-19 vaccines are safer than the COVID-19 mRNA vaccines                              | <input type="checkbox"/> 1 Strongly disagree<br><input type="checkbox"/> 2 Disagree<br><input type="checkbox"/> 3 Agree<br><input type="checkbox"/> 4 Strongly agree<br><input type="checkbox"/> 5 Don't know/no opinion |
| 4 | The COVID-19 mRNA vaccines generate a stronger immune response than the conventional/traditional vaccines             | <input type="checkbox"/> 1 Strongly disagree<br><input type="checkbox"/> 2 Disagree<br><input type="checkbox"/> 3 Agree<br><input type="checkbox"/> 4 Strongly agree<br><input type="checkbox"/> 5 Don't know/no opinion |
| 5 | The COVID-19 mRNA vaccines may contain microchips                                                                     | <input type="checkbox"/> 1 Strongly disagree<br><input type="checkbox"/> 2 Disagree<br><input type="checkbox"/> 3 Agree<br><input type="checkbox"/> 4 Strongly agree<br><input type="checkbox"/> 5 Don't know/no opinion |
